# Supplementary material for: Combinatorial DNA methylation codes at repetitive elements
Source: HighWire-hosted journal article supplement (doi:10.1101/gr.213983.116), 2017-03-27
Supplement: Supplemental_Figure_legends.docx [file Supplemental_Figure_legends.docx]

**Supplemental Figure legends**

**Supplemental Figure 1. Genome-wide distribution of 5mC/5hmC/5fC/5caC in control and *Tdg*-deficient MEFs. (a)** Dot blot assays showing that 5mC, 5hmC, 5fC and 5caC antibodies specifically recognize 5mC, 5hmC, 5fC and 5caC-containing substrates, respectively. **(b)** RT–qPCR (upper panel) and immunoblotting (lower panel) analyses of TDG expression levels in control (shSCR) and *Tdg*-deficient (shTDG) MEFs.In the bar graph,values represent means of two biological replicates. Error bars represent the range of the duplicate values. **(c)** Genome browser views indicating 5mC, 5hmC, 5fC and 5caC peaks in control and *Tdg*-deficient MEFs. **(d)** Scatter plot comparing global gene expression levels between control and *Tdg*-deficient MEFs. Note that 160 genes are over-expressed and 38 genes are down-regulated in the absence of TDG (fold change=|log2(KO/WT)| > 1 and *P*-value< 0.05). **(e)** Normalized density of 5mC, 5hmC, 5fC and 5caC signals showing a specific depletion of cytosine modification at CGIs. Tag densities were collected in 50 bp sliding windows spanning 3 kb (divided in 20 bins) of the length-normalized CGI (divided in 10 bins). **(f)** Venn diagrams showing the overlap between 5mC, 5hmC, 5fC and 5caC peaks in control (shSCR) and *Tdg*-deficient MEFs (shTDG). Note the strong overlap between 5hmC, 5fC and 5caC peaks. **(g)** Repetitive elementsin the mouse genome (total elements, left panel, and families showing a specific *Tdg*-dependent DNA methylation dynamic between MEFs and ESCs, right panel).

**Supplemental Figure 2. DNA methylation dynamics at LTRs in MEFs and ESCs.** Relative enrichment for each cytosine modification at each LTR subfamily in control and *Tdg*-deficient MEFs (left panels) and ESCs (right panels). LTRext (a) and LTRint regions (b) were analyzed separately. LTR subfamilies were sorted by class and within each LTR class, young mouse-specific elements were isolated from ancestral elements. In the absence of statistically significant enrichment for each cytosine modification at any LTRext and LTRint region of the ERVL class, these families were omitted for clarity. * *P*-value< 0.05.

**Supplemental Figure 3. The evolutionarily youngest SINEs are integrated at close distances around CGIs. (a)** The methylation level of SINE families correlates with their CG density and their evolutionary conservation. Average conservation scores (black columns) and CG density (number of CpG dinucleotides per 100 bases, red columns) of different SINE families. **(b)** Genome browser views indicating 5mC, 5hmC, 5fC and 5caC distribution in MEFs at a genomic region showing a high concentration of mouse-specific SINEs. **(c)** Box-plots comparing the distance to TSS distribution of B1m (top panel) or B2m elements (bottom panel) according to their 5mC density. The statistical difference between groups was assessed by Mann-Whitney-Wilcoxon test : NS = no significant, * *P*-value < 10-2, *** *P*-value < 10-4. **(d)** Genome browser views indicating that 5mC peaks overlap with recently integrated SINEs (mouse-specific) in control and *Tdg*-deficient MEFs (upper panel). Hypermethylated mouse-specific SINEs are concentrated at close distances around CGIs (zooms 1, 2 and 3, lower panel).

**Supplemental Figure 4. The TDG-dependent dynamics of cytosine modifications at LINEs correlates with their evolutionary age. (a)** Percentage of L1Md LINEs in mouse genome (total elements or full-length LINEs, length > 5 kb). **(b)** Average conservation scores (black columns) and CG density (number of CpG per 100 nucleotides, red columns) of LINEs. **(c)** Genome browser views indicating 5mC, 5hmC, 5fC and 5caC peaks in control and *Tdg*-deficient MEFs at three selected L1Md elements representative of each cluster described in the Figure 4. **(d)** Relative enrichment for each cytosine modification at each LINE family in control and *Tdg*-deficient MEFs (left panels) and ESCs (right panels). LINE families were sorted in two groups relative to their appearance in the rodent lineage (mouse-specific and ancestral). LINEs from the mouse-specific group were sorted according to their integration age in the mouse genome. Blue, orange or black asterisks (*) indicate significant enrichment (*P*-value< 0.05) in control (shSCR/Input) in *Tdg*-deficient MEFs (shTDG/Input) or in both conditions, respectively. **(e)** Functional clustering of genes containing full-length L1Md (length > 4 kb) in their gene body (n = 1,174).

**Supplemental Figure 5. Specific accumulation of 5mC oxidation derivatives at simple repeats containing CAC motif. (a)** Average CA and CG densities (number of dinucleotides per 100 bases) in CA repeats, in CGIs and in the mouse genome. **(b)** Genome browser views showing that 5hmC peaks overlap with CA repeats. The zoom view shows the sequence of a strongly hydroxymethylated CA repeat element. CpG, CpA, CpC and CpT dinucleotides are highlighted in green, red, yellow and blue, respectively. **(c)** Genome browser views showing that 5hmC, 5fC and 5caC peaks overlap with CA repeats in control and *Tdg*-deficient MEFs. **(d)** Box-plots comparing the distance to TSS distribution of CA repeats according to their 5hmC density. The statistical difference between groups was assessed by Mann-Whitney-Wilcoxon test. NS = no significant, * *P*-value < 10-2, ** *P*-value < 10-3, *** *P*-value < 10-4. **(e)** Heatmaps of 5mC/5hmC/5fC/5caC/RNA/Pol2/H3K9me3 levels within gene bodies. Genes were sorted according to the presence or the absence of CA repeats in their gene body (CA repeat-containing, left panel or CA repeat-free, right panel, respectively). Within both groups, genes were then sorted according to their expression level. **(f)** Gene length distribution of genes containing CA repeats or not. **(g)** Relative enrichment of each cytosine modification at CA repeats and at all other simple repeat families in control and *Tdg*-deficient MEFs (left panel) and ESCs (right panel). * *P*-value< 0.05. **(h)** Relative enrichment for each cytosine modification at different simple repeat families in control and *Tdg*-deficient MEFs. The CG, CA, CC and CT subfamilies regroup simple repeats containing a cytosine in their repeat motif followed by an G, A, C or T, respectively (left panel). The CAA, CAC, CAG and CAT subfamilies regroup simple repeats containing the CpA dinucleotide in their repeat motif followed by a A, C, G or T, respectively (right panel). * *P*-value< 0.05**. (i)** Heatmaps of 5mC/5hmC/5fC/5caC levels in control and *Tdg*-deficient MEFs (left panel) or ESCs (right panel) at CA repeats. Tag count clustering reveals that CA repeats which are highly enriched in 5mC oxidation derivative in MEFs correspond to those being strongly methylated in ESCs.

**Supplemental Figure 6. Similar DNA methylation patterns at major satellites and DNA transposons in MEFs and ESCs.** Relative enrichment for each cytosine modification at major satellites (a) and DNA transposons (b) in control and *Tdg*-deficient MEFs (left panels) and ESCs (right panels). Note that major satellites show a unique cytosine modification pattern characterized by a specific 5mC and 5fC enrichment.
